# Supplementary material
Source: ML conference proceedings conference paper supplement (https://proceedings.neurips.cc/paper_files/paper/2015/hash/1ee3dfcd8a0645a25a35977997223d22-Abstract.html)
Supplement: Supplementary file [file 1ee3dfcd8a0645a25a35977997223d22-Supplemental.zip]

---

# Spectral Norm Regularization of Orthonormal Representations for Graph Transduction

---

**Rakesh Shivanna**

Google Inc.

Mountain View, CA, USA

rakeshshivanna@google.com

**Bibaswan Chatterjee**

Dept. of Computer Science & Automation

Indian Institute of Science, Bangalore

bibaswan.chatterjee@csa.iisc.ernet.in

**Raman Sankaran, Chiranjib Bhattacharyya**

Dept. of Computer Science & Automation

Indian Institute of Science, Bangalore

ramans, chiru@csa.iisc.ernet.in

**Francis Bach**

INRIA - Sierra Project-team

École Normale Supérieure, Paris, France

francis.bach@ens.fr

## A Preliminaries and Definitions

For completeness, we state/prove some of the non-trivial results used in the paper.

**Notations.** Let  $\|\cdot\|_0$  and  $\|\cdot\|_\infty$  be the L0 and L-infinity norms respectively. For  $y \in \mathcal{Y}$  and  $\hat{y} \in \hat{\mathcal{Y}}$ ; let  $\ell^{hng}(y, \hat{y}) = (1 - y\hat{y})_+^1$ ,  $\ell^r(y, \hat{y}) = \min\{1, (1 - y\hat{y})_+\}$  and  $\ell^{0-1}(y, \hat{y}) = \mathbb{1}[y\hat{y} < 0]$  denote the hinge, ramp and 0-1 loss respectively. Note that these loss functions upper bound the other in same order,  $\ell^{hng} \geq \ell^r \geq \ell^{0-1}$ .

**Asymptotic Notations [1].** For non-negative functions  $f_1(n)$  and  $f_2(n)$

- $f_1(n) = O(f_2(n)) \implies \exists n_0$  and a constant  $c > 0$  such that  $\forall n > n_0, f_1(n) \leq cf_2(n)$ .
- $f_1(n) = \Omega(f_2(n)) \implies \exists n_0$  and a constant  $c > 0$  such that  $\forall n > n_0, f_1(n) \geq cf_2(n)$ .
- $f_1(n) = \Theta(f_2(n))$  iff  $f_1(n) = O(f_2(n))$  and  $f_1(n) = \Omega(f_2(n))$ .

## B Generalization Bound

Let  $\mathbf{U} \in \text{Lab}(G)$  be the orthonormal embedding corresponding to the graph kernel  $\mathbf{K} \in \mathcal{K}(G)$ . Note that the classifier learnt by the SVM formulation  $\omega_C(\mathbf{K}, \mathbf{y}_S)$  as in (3) (paper), is of the form  $h = \mathbf{U}\alpha$ , where  $\alpha$  is in the feasible set. In general, we define the following function class associated with the orthonormal embedding

$$\tilde{\mathcal{H}}_{\mathbf{U}} = \{h \mid h = \mathbf{U}\alpha, \alpha \in \mathbb{R}^n, \|\alpha\|_\infty \leq C, \|\alpha\|_0 \leq m\} \quad (1)$$

We follow a similar proof technique as in [3], however specialize to the class of orthonormal representation and SPORE formulation.

**Theorem 1. (Paper)** Let  $G = (V, E)$  be a simple graph with unknown binary labels  $\mathbf{y} \in \mathcal{Y}^n$  on the vertices  $V$ . Let  $\mathbf{K} \in \mathcal{K}(G)$ . Given  $G$ , and labels of a randomly drawn subgraph  $S$ , let  $\hat{\mathbf{y}} \in \hat{\mathcal{Y}}^n$  be the predictions learnt by  $\omega_C(\mathbf{K}, \mathbf{y}_S)$  as in (3) (paper). Then, for  $m \leq n/2$ , with probability  $\geq 1 - \delta$  over the choice of  $S \subset V$ , such that  $|S| = m$

$$er_S^{0-1}[\hat{\mathbf{y}}] \leq \frac{1}{m} \sum_{i \in S} \ell^{hng}(y_i, \hat{y}_i) + 2C\sqrt{2\lambda_1(\mathbf{K})} + O\left(\sqrt{\frac{1}{m} \log \frac{1}{\delta}}\right) \quad (2)$$

---

<sup>1</sup> $(a)_+ = \max(a, 0)$ .

*Proof.* Let  $\mathbf{U} \in \text{Lab}(G)$  be the orthonormal representation associated with  $\mathbf{K}$ . Let  $\pi = [\pi_1, \dots, \pi_n]$  denote a permutation on  $[n]$ . For any  $\pi$ , without loss of generality, let the first  $m \in [n]$  nodes be labelled. Let  $er_S^{r,\pi}[\hat{\mathbf{y}}] = \frac{1}{m} \sum_{i=1}^m \ell^r(y_{\pi_i}, \hat{y}_{\pi_i})$ , where  $\ell^r$  is the ramp loss as in Section A; and similarly for  $er_S^{r,\pi}[\tilde{\mathbf{y}}]$ . Let  $\tilde{\pi} = [1, 2, \dots, n]$  denote the trivial permutation. Introduce a ghost permutation –

$$\begin{aligned} er_S^{r,\tilde{\pi}}[\hat{\mathbf{y}}] &\leq er_S^{r,\tilde{\pi}}[\hat{\mathbf{y}}] + er_S^{r,\tilde{\pi}}[\tilde{\mathbf{y}}] - er_S^{r,\tilde{\pi}}[\tilde{\mathbf{y}}] \\ &\leq er_S^{r,\tilde{\pi}}[\hat{\mathbf{y}}] + \sup_{\tilde{\mathbf{y}} \in \tilde{\mathcal{Y}}_{\mathbf{U}}} \left[ er_S^{r,\tilde{\pi}}[\tilde{\mathbf{y}}] - er_S^{r,\tilde{\pi}}[\tilde{\mathbf{y}}] \right] \leq er_S^{r,\tilde{\pi}}[\hat{\mathbf{y}}] + \Phi_{\mathbf{U}}^{\tilde{\pi}}[\hat{\mathbf{y}}] \end{aligned} \quad (3)$$

where

$$\Phi_{\mathbf{U}}^{\tilde{\pi}}[\hat{\mathbf{y}}] = \mathbb{E}_{\pi} \sup_{\tilde{\mathbf{y}} \in \tilde{\mathcal{Y}}_{\mathbf{U}}} \left[ er_S^{r,\tilde{\pi}}[\hat{\mathbf{y}}] - er_S^{r,\pi}[\tilde{\mathbf{y}}] + er_S^{r,\pi}[\tilde{\mathbf{y}}] - er_S^{r,\tilde{\pi}}[\tilde{\mathbf{y}}] \right]$$

where  $\tilde{\mathcal{Y}}_{\mathbf{U}} = \{\tilde{\mathbf{y}} | \tilde{\mathbf{y}} = \mathbf{U}^{\top} h, h \in \tilde{\mathcal{H}}_{\mathbf{U}}\}$ , for  $\tilde{\mathcal{H}}_{\mathbf{U}}$  as in (1). (3) follows by adding and subtracting  $\mathbb{E}_{\pi}[er_S^{r,\pi}[\tilde{\mathbf{y}}]] = \mathbb{E}_{\pi}[er_S^{r,\pi}[\hat{\mathbf{y}}]]$  inside the supremum and applying Jensen's inequality to bring the expectation of out the supremum.

We use Doob's martingale process (see [2]) to bound the function  $\Phi_{\mathbf{U}}^{\tilde{\pi}}$  by its expectation –

**Lemma 1.** *Given  $n \in \mathbb{N}$  and  $m \in [n]$ , let  $\pi$  be a random permutation vector over  $[n]$ . Let  $\pi^{ij}$  to denote perturbed permutation, where  $i^{\text{th}}$  and  $j^{\text{th}}$  elements are exchanged. Let  $f(\pi)$  be an  $\pi$ -permutation symmetric function satisfying  $|f(\pi) - f(\pi^{ij})| \leq \beta \forall i \in [m], j \notin [m]$ . Then*

$$\Pr_{\pi} \{f(\pi) - \mathbb{E}_{\pi}[f(\pi)] \geq \epsilon\} \leq \exp\left(-\frac{\epsilon^2}{\beta^2 m}\right)$$

Using the above for  $\beta = \frac{2}{m}$ , we get for  $\delta > 0$ , w.p.  $\geq 1 - \delta$  over the permutation  $\tilde{\pi}$

$$\Phi_{\mathbf{U}}^{\tilde{\pi}}[\hat{\mathbf{y}}] \leq \mathbb{E}_{\pi}[\Phi_{\mathbf{U}}^{\pi}[\hat{\mathbf{y}}]] + 2\sqrt{\frac{1}{m} \log \frac{1}{\delta}} \quad (4)$$

Now we bound  $\mathbb{E}_{\pi}[\Phi_{\mathbf{U}}^{\pi}[\hat{\mathbf{y}}]]$  using results of [3] as follows

$$\mathbb{E}_{\pi}[\Phi_{\mathbf{U}}^{\pi}[\hat{\mathbf{y}}]] \leq R\left(\mathcal{L}_{\mathbf{U}}^r, m, \frac{mu}{n^2}\right) + O\left(\frac{1}{\sqrt{m}}\right) \quad (5)$$

where  $\mathcal{L}_{\mathbf{U}}^r = \{[\ell^r(y_1, \tilde{y}_1), \dots, \ell^r(y_n, \tilde{y}_n)] | \tilde{\mathbf{y}} \in \tilde{\mathcal{Y}}_{\mathbf{U}}\}$ , and  $R(\mathcal{V}, m) := \frac{2}{m} \mathbb{E}_{\sigma} \left[ \sup_{\mathbf{v} \in \mathcal{V}} \mathbf{v}^{\top} \sigma \right]$  is the Rademacher average of the vector space  $\mathcal{V} \subseteq \mathbb{R}^n$ , where  $\sigma$  is an i.i.d. random vector, each entry taking values  $+1, -1, 0$  with probability  $p, p, 1-p$  respectively;  $p := m/n$ . We recall the following interesting property of Rademacher averages [3] –

**Lemma 2.** *For any  $\mathcal{V} \subseteq \mathbb{R}^n$ ,  $m \in [n]$  and  $0 \leq p_1 \leq p_2 \leq \frac{1}{2}$ ,  $R(\mathcal{V}, m, p_1) \leq R(\mathcal{V}, m, p_2)$ .*

Using the above, we get

$$R\left(\mathcal{L}_{\mathbf{U}}^r, m, \frac{mu}{n^2}\right) \leq R\left(\mathcal{L}_{\mathbf{U}}^r, m, \frac{m}{n}\right) \leq R\left(\tilde{\mathcal{Y}}_{\mathbf{U}}, m, \frac{m}{n}\right) \quad (6)$$

where the last inequality follows from the contraction property [3] of the class complexity. Note that (6) relates to the function class, for which we can derive a tight estimate as follows – We derive the following tight Rademacher complexity estimate for the class of orthonormal embeddings –

**Lemma 3.**  $R\left(\tilde{\mathcal{Y}}_{\mathbf{U}}, m, \frac{m}{n}\right) \leq 2C\sqrt{2\lambda_1(\mathbf{K})}$

For any random vector  $\sigma$ , the supremum is given by

$$\sup_{\tilde{\mathbf{y}} \in \tilde{\mathcal{Y}}_{\mathbf{U}}} \sum_{i \in [n]} \sigma_i \tilde{y}_i = \sup_{h \in \tilde{\mathcal{H}}_{\mathbf{U}}} \sum_{i \in [n]} \sigma_i \langle h, \mathbf{u}_i \rangle = \sup_{h \in \tilde{\mathcal{H}}_{\mathbf{U}}} \left\langle h, \sum_{i \in [n]} \sigma_i \mathbf{u}_i \right\rangle \leq C\sqrt{m\lambda_1(\mathbf{K})} \left\| \sum_{i \in [n]} \sigma_i \mathbf{u}_i \right\|$$

The last equality from optimality over supremum and the norm constraint

$$\max_{h \in \mathcal{H}_{\mathbf{U}}} \|h\| = \max_{\|\alpha\|_{\infty} \leq C, \|\alpha\|_0 \leq m} \sqrt{\alpha^{\top} \mathbf{K} \alpha} \leq C \sqrt{m \lambda_1(\mathbf{K})}$$

Now, taking expectation over  $\sigma$ , one obtains

$$R\left(\tilde{\mathcal{Y}}_{\mathbf{U}}, m, \frac{m}{n}\right) = 2C \sqrt{\frac{\lambda_1(\mathbf{K})}{m}} \mathbb{E}_{\sigma} \left[ \sqrt{\sigma^{\top} \mathbf{K} \sigma} \right] \quad (7)$$

Using Jensen's inequality, the expectation term can be upper bounded by  $\sqrt{\mathbb{E}_{\sigma} [\sigma^{\top} \mathbf{K} \sigma]}$ . Further, using *i.i.d.* assumption of  $\sigma$ , the expectation evaluates to  $(2m/n) \sum_{i \in [n]} K_{ii} = 2m$ . Plugging back in (7) proves the lemma. Finally, (2) is immediate by combining Lemma 3, (6), (5), (4) and (3).  $\square$

## C SPORE formulation and PAC analysis

We show that the spectral norm of the kernel relates to the structural properties of the graph

**Lemma 2.** (*Paper*) Given a simple, undirected graph  $G = (V, E)$ ,  $\max_{\mathbf{K} \in \mathcal{K}(G)} \lambda_1(\mathbf{K}) = \vartheta(\bar{G})$ .

*Proof.* We recall another definition of the  $\vartheta$  function [6]

$$\vartheta(\bar{G}) = \max_{\mathbf{U} \in \text{Lab}(G)} \max_{\mathbf{c} \in \mathcal{S}_2^{d-1}} \sum_{i \in [n]} (\mathbf{u}_i^{\top} \mathbf{c})^2 \quad (8)$$

For a fixed  $\mathbf{U} \in \text{Lab}(G)$  and  $\mathbf{c} \in \mathcal{S}_2^{d-1}$ , the summation evaluates to  $\mathbf{c}^{\top} \mathbf{U} \mathbf{U}^{\top} \mathbf{c}$ . Thus, for any fixed  $\mathbf{U} \in \text{Lab}(G)$ ,  $\max_{\mathbf{c} \in \mathcal{S}_2^{d-1}} \sum_{i \in [n]} (\mathbf{u}_i^{\top} \mathbf{c})^2 = \lambda_1(\mathbf{U} \mathbf{U}^{\top})$ . From first principles,  $\lambda_1(\mathbf{U} \mathbf{U}^{\top}) = \lambda_1(\mathbf{U}^{\top} \mathbf{U}) = \lambda_1(\mathbf{K})$ , where  $\mathbf{K} = \mathbf{U}^{\top} \mathbf{U} \in \mathcal{K}(G)$  (Section 1, paper). As there is correspondence between the two sets  $\text{Lab}(G)$  and  $\mathcal{K}(G)$  (Section 1), (8) evaluates to  $\vartheta(\bar{G}) = \max_{\mathbf{K} \in \mathcal{K}(G)} \lambda_1(\mathbf{K})$ , thus proving the claim.  $\square$

Following the proof technique of [7] and [5], we prove –

**Lemma 3.** (*paper*) Given  $G$  and  $\mathbf{y}$ , for any  $S \subseteq V$  and  $C > 0$

$$\min_{\mathbf{K} \in \mathcal{K}(G)} \omega_C(\mathbf{K}^S, \mathbf{y}_S) \leq \vartheta(G)/2$$

*Proof.* We recall another definition of the  $\vartheta$  function [6]

$$\vartheta(G) = \min_{\mathbf{U} \in \text{Lab}(G)} \min_{\mathbf{c} \in \mathcal{S}_2^{d-1}} \max_{i \in [n]} \frac{1}{(\mathbf{c}^{\top} \mathbf{u}_i)^2} \quad (9)$$

For a fixed  $\mathbf{K}$ , from the primal of SVM formulation, it follows that

$$\omega_{\infty}(\mathbf{K}^S, \mathbf{y}_S) = \min_{\mathbf{w} \in \mathbb{R}^d} \frac{1}{2} \|\mathbf{w}\|^2 \quad \text{s.t.} \quad y_i \mathbf{w}^{\top} \mathbf{u}_i \geq 1 \quad \forall i \in S$$

where  $\mathbf{U}$  is the orthonormal representation corresponding to  $\mathbf{K}$  (Section 1). Now, writing  $\mathbf{w} = t\mathbf{c}$ , where  $\mathbf{c} \in \mathcal{S}_2^{d-1}$

$$\begin{aligned} &= \min_{t, \mathbf{c} \in \mathcal{S}_2^{d-1}} t^2 \quad \text{s.t.} \quad t \geq \frac{1}{y_i \mathbf{c}^{\top} \mathbf{u}_i} \quad \forall i \in S \\ &= \min_{\mathbf{c} \in \mathcal{S}_2^{d-1}} \max_{i \in S} \frac{1}{(y_i \mathbf{c}^{\top} \mathbf{u}_i)^2} \\ &= \min_{\mathbf{c} \in \mathcal{S}_2^{d-1}} \max_{i \in S} \frac{1}{(\mathbf{c}^{\top} \mathbf{u}_i)^2} \leq \min_{\mathbf{c} \in \mathcal{S}_2^{d-1}} \max_{i \in [n]} \frac{1}{(\mathbf{c}^{\top} \mathbf{u}_i)^2} \end{aligned}$$

Thus, the proof follows from (9), using a trivial bound  $\omega_C(\mathbf{K}^S, \mathbf{y}_S) \leq \omega_{\infty}(\mathbf{K}^S, \mathbf{y}_S)$  and noting that the sets  $\text{Lab}(G)$  and  $\mathcal{K}(G)$  are equivalent Section 1.  $\square$

**Theorem 4.** (paper) Let  $G = (V, E)$ ,  $V = [n]$  be a simple graph with unknown binary labels  $\mathbf{y} \in \mathcal{Y}^n$  on the vertices  $V$ . Given  $G$ , and labels of a randomly drawn subgraph  $S \subset V$ ,  $m = |S|$ ; let  $\hat{\mathbf{y}}$  be the predictions learnt by SPORE (5), for parameters  $C = \left(\frac{\vartheta(G)}{m\sqrt{\vartheta(\bar{G})}}\right)^{\frac{1}{2}}$  and  $\beta = \frac{\vartheta(G)}{\vartheta(\bar{G})}$ . Then, for  $m \leq n/2$ , with probability  $\geq 1 - \delta$  over the choice of  $S \subset V$ , such that  $|S| = m$

$$er_{\bar{S}}^{0.1}[\hat{\mathbf{y}}] = O\left(\frac{1}{m}\left(\sqrt{n\vartheta(G)} + \log \frac{1}{\delta}\right)\right)^{\frac{1}{2}}$$

*Proof.* Let  $\mathbf{K}^*$  be the kernel learnt by SPORE (5). Using Theorem 1 (paper) for final predictions  $\hat{\mathbf{y}}$ , we obtain

$$er_{\bar{S}}^{0.1}[\hat{\mathbf{y}}] \leq \frac{1}{m} \sum_{i \in S} \ell^{hng}(y_i, \hat{y}_i) + 2C\sqrt{2\lambda(\mathbf{K}^*)} + O\left(\sqrt{\frac{1}{m} \log \frac{1}{\delta}}\right)$$

Using Lemma 2 (paper)  $\lambda(\mathbf{K}^*) \leq \vartheta(\bar{G})$ , where  $\bar{G}$  is complement graph of  $G$

$$\leq \frac{1}{m} \sum_{i \in S} \ell^{hng}(y_i, \hat{y}_i) + 2C\sqrt{2\vartheta(\bar{G})} + O\left(\sqrt{\frac{1}{m} \log \frac{1}{\delta}}\right) \quad (10)$$

Recall the primal formulation of (3) (paper) for  $\mathbf{K}^* = \mathbf{U}^{*\top} \mathbf{U}^*$ ,  $\mathbf{U}^* \in \text{Lab}(G)$  (Section 1)

$$\omega_C(\mathbf{K}^*, \mathbf{y}_S) = \min_{\mathbf{w} \in \mathbb{R}^d} \frac{1}{2} \|\mathbf{w}\|_2^2 + C \sum_{i \in S} \ell^{hng}(y_i, \mathbf{w}^\top \mathbf{u}_i^*)$$

Let  $\mathbf{w}^*$  be the solution at optimal, then note that  $\hat{y}_i = \mathbf{w}^{*\top} \mathbf{u}_i^*$ ,  $\forall i \in [n]$ . Thus, we bound the empirical error as follows

$$\begin{aligned} C \sum_{i \in S} \ell^{hng}(y_i, \hat{y}_i) &= \omega_C(\mathbf{K}^*, \mathbf{y}_S) - \frac{1}{2} \|\mathbf{w}^*\|_2^2 \leq \omega_C(\mathbf{K}^*, \mathbf{y}_S) \\ &\leq \Psi_{C,\beta}(G, \mathbf{y}_S) = \min_{\mathbf{K} \in \mathcal{K}(G)} \omega_C(\mathbf{K}^S, \mathbf{y}_S) + \beta \lambda_1(\mathbf{K}) \\ &\leq \min_{\mathbf{K} \in \mathcal{K}(G)} \omega_C(\mathbf{K}^S, \mathbf{y}_S) + \beta \max_{\mathbf{K} \in \mathcal{K}(G)} \lambda_1(\mathbf{K}) \leq \frac{\vartheta(G)}{2} + \beta \vartheta(\bar{G}) \end{aligned}$$

The last inequality follows from Lemma 2 and 3 (paper). Plugging back in (10), we get

$$er_{\bar{S}}^{0.1}[\hat{\mathbf{y}}] \leq \frac{1}{2Cm} \vartheta(G) + \frac{\beta}{Cm} \vartheta(\bar{G}) + 2C\sqrt{2\vartheta(\bar{G})} + O\left(\sqrt{\frac{1}{m} \log \frac{1}{\delta}}\right) \quad (11)$$

Choosing  $\beta$  such that  $\frac{\beta}{Cm} \vartheta(\bar{G}) = 2C\sqrt{2\vartheta(\bar{G})}$  and optimizing for  $C$  gives us the choice of parameters as in the statement of the theorem. Plugging back in (11), we get

$$= O\left(\frac{1}{\sqrt{m}} \left(\sqrt{\vartheta(G)} \sqrt{\vartheta(\bar{G})} + \sqrt{\log \frac{1}{\delta}}\right)\right)$$

Finally, using  $\vartheta(G)\vartheta(\bar{G}) = n$  [6], and concavity  $\sqrt{a} + \sqrt{b} \leq \sqrt{2(a+b)}$  proves the result.  $\square$

## D Proposed Algorithms

### D.1 The Projection Algorithm

Algorithm 1 lists the steps of the accelerated gradient descent algorithm FISTA applied to 16. The objective  $p_{\sigma_X}$  is composed of the smooth term  $p_{\sigma_X}^s(a, b) = \frac{1}{2} \|v - a - b\|^2$  with the Lipschitz continuous gradients with constant  $L_p = 1$ , and the non smooth term  $p_{\sigma_X}^n(a, b) = \sigma_A(a) + \sigma_B(b)$ . Step 6 executes a gradient descent on  $a$  with respect to  $p_{\sigma_X}$  followed by a proximal mapping with  $\sigma_A$ . The gradient of  $p_{\sigma_X}$  equals  $a + b - v$ , and the stepsize chosen to be  $\frac{1}{L_p} = 1$ . Similarly step 6 perform the

gradient descent on  $b$  followed by the proximal mapping with  $\sigma_B$ . The definitions for the support functions and its associated operators are provided in Section D.3.

The algorithm requires as input the current iterate  $v_k = x_k - \alpha_k g_k$  to project into the set  $\mathcal{X}$ , and the number of iterations  $S$  and returns an approximate projection  $x_{k+1} = v_k - a_S - b_S$ .

For a graph  $G = (V, E)$ , the set  $\mathcal{X} = A \cap B$  is defined with

$$A = \{\mathbf{K} \in \mathbb{R}^{n \times n} | \mathbf{K} \succeq 0, \text{tr}(\mathbf{K}) = n\} \text{ and } B = \{\mathbf{K} \in \mathbb{R}^{n \times n} | \mathbf{K}_{ii} = 1, i \in [n], \mathbf{K}_{ij} = 0, (i, j) \notin E\} \quad (12)$$

---

**Algorithm 1** Accelerated Gradient Descent (FISTA) to solve 11

---

```

1: function IIP FISTA( $v, S$ )
2:   Initialize  $a_0 = 0, b_0 = 0$ .
3:   Initialize  $(\hat{a}_0, \hat{b}_0) = (a_0, b_0)$ .
4:   Initialize  $t_0 = 1$ .
5:   for  $t = 1, \dots, S$  do
6:      $a_t = \text{prox}_{\sigma_A}(v - b_t)$ . ▷ Use (14) for  $\text{prox}_{\sigma_A}$ 
7:      $b_t = \text{prox}_{\sigma_B}(v - a_t)$ . ▷ Use (21) for  $\text{prox}_{\sigma_B}$ 
8:      $\beta_t = \frac{1 + \sqrt{1 + 4\beta_{t-1}^2}}{2}$ 
9:      $\hat{a}_t = a_t + \frac{\beta_{t-1} - 1}{\beta_t} (a_t - a_{t-1})$ 
10:     $\hat{b}_t = b_t + \frac{\beta_{t-1} - 1}{\beta_t} (b_t - b_{t-1})$ 
11:   end for
12:   return  $z = v - a_S - b_S$ 
13: end function

```

---

## D.2 Subgradient Descent Algorithm With Approximate Projection

We now use the approximate projection on  $\mathcal{X}$  computed in Algorithm 1 to solve (8). In particular we analyze the following algorithm

---

**Algorithm 2** Approximate Projected sub-gradient descent

---

```

1: function APPROX-PROJ-SUBG( $\mathbf{K}_0, L, R, \hat{R}, T$ )
2:    $s = \frac{L}{\sqrt{T}} \cdot (\sqrt{R^2} + \hat{R}^2)$  ▷ compute stepsize
3:   Initialize  $t_0 = 1$ .
4:   for  $t = 1, \dots, T$  do
5:     compute  $h_{t-1}$  ▷ subgradient of  $f$  at  $\mathbf{K}_{t-1}$ 
6:      $v_t = \mathbf{K}_{t-1} - \frac{s}{\|h_{t-1}\|} h_{t-1}$ 
7:      $\tilde{\mathbf{K}}_t = \text{IIP FISTA}(v_t, \sqrt{T})$  ▷ Use Algorithm 1
8:      $\mathbf{K}_t = \text{Proj}_A(\tilde{\mathbf{K}}_t) = \mathbf{K}_t - \text{prox}_{\sigma_A}(\mathbf{K}_t)$  ▷ Use (14)
9:   end for
10: end function

```

---

## D.3 Support Functions and their Proximal operators

### D.3.1 Support functions

The expressions for the support functions  $\sigma_A$  and  $\sigma_B$  are provided below.

**Claim 1.**  $\sigma_A(a) = n \max(\lambda_{\max}(a), 0)$

*Proof.*  $\sigma_A(a) = \max_{\mathbf{K} \in A} \text{tr}(a^\top \mathbf{K})$ . The Eigen decomposition of  $a$  gives  $a = \sum_i \lambda_i \mathbf{u}_i \mathbf{u}_i^\top = \mathbf{U} \mathbf{\Lambda} \mathbf{U}^\top$ , where the  $\mathbf{u}_i$ 's are chosen to be forming an orthogonal basis. The matrix  $\mathbf{K}$  can be written

using this basis as  $\mathbf{U}\mathbf{M}\mathbf{U}^\top$ , where  $\mathbf{M}$  need not be a diagonal one.

$$\text{tr}(a^\top \mathbf{K}) = \text{tr}(\mathbf{U}\mathbf{M}\mathbf{U}^\top \mathbf{U}\mathbf{\Lambda}\mathbf{U}^\top) = \text{tr}(\mathbf{U}\mathbf{M}\mathbf{\Lambda}\mathbf{U}^\top) = \text{tr}(\mathbf{M}\mathbf{\Lambda}) \leq \sum_{i:\lambda_i > 0} M_{ii}\lambda_i, \quad (13)$$

since  $M_{ii}$  need to be non-negative. Now,

$$\max_{\mathbf{K} \in \mathcal{S}} \text{tr}(a^\top \mathbf{K}) \leq \max_{M_{ii} > 0, \sum_i M_{ii} \leq n} \sum_{i:\lambda_i > 0} M_{ii}\lambda_i = n \max(\lambda_{\max}(\mathbf{X}), 0)$$

Hence, by choosing  $M_{ii} = n$  for  $i$  corresponding to the largest positive eigen value, or  $M_{ii} = 0$ , if  $\lambda_i < 0, \forall i$ , we get  $\sigma_A(a) = n \max(\lambda_{\max}(a), 0)$ .  $\square$

**Claim 2.**  $\sigma_B(b) = \max_{K \in B} \text{tr}(b^\top K) = \begin{cases} \text{tr}(b) & b_{ij} = 0, \forall (i, j) \in E \\ \infty & \text{otherwise.} \end{cases}$

*Proof.* Trivial by using the definition of the support function.  $\square$

### D.3.2 Proximal operators

**Claim 3.**  $\text{prox}_{\sigma_A}^\alpha(\hat{a}) = \mathbf{U}\text{Diag}(\text{prox}_m^\alpha(z))\mathbf{U}^\top$ , where  $\mathbf{U}\text{Diag}(z)\mathbf{U}^\top$  is the eigen decomposition of  $\hat{a}$  and  $m(z) = \max([z; 0])$ . And  $\text{prox}_m^\alpha(z)|_i = \min(z_i, \max(t_{\max}^*, 0))$  where  $t_{\max}^*$  is the solution of

$$\sum_{i=1}^n \frac{1}{\alpha} (z_i - t)_+ = 1 \quad (14)$$

*Proof.*

$$\begin{aligned} \text{prox}_m^\alpha(z) &= \underset{x}{\text{argmin}} \frac{1}{2\alpha} \|x - z\|_2^2 + \max([x; 0]) \\ &= \underset{z; t \geq x_i, t \geq 0}{\text{argmin}} \frac{1}{2\alpha} \|x - z\|_2^2 + t \end{aligned} \quad (15)$$

Let  $L(x, t, \mu) = \frac{1}{2\alpha} \|x - z\|_2^2 + t - \xi t + \sum_{i=1}^n \mu_i (x_i - t)$ . Equating the gradient of the Lagrangian function to 0 at optimality,

$$\frac{\partial L}{\partial x_i} = \frac{1}{\alpha} (x_i^* - z_i^*) + \mu_i^* = 0. \quad (16)$$

$$\frac{\partial L}{\partial t} = \sum_{i=1}^n \mu_i^* + \xi^* = 1. \quad (17)$$

The KKT optimality conditions provide

$$\xi^* t^* = 0, \mu_i^* (x_i^* - t^*) = 0 \quad (18)$$

$\mu_i^* > 0 \Rightarrow x_i = t^*$ . Combining this with the constraint  $\mu_i \geq 0$  and (16) gives  $\mu_i = \frac{1}{\alpha} (z_i - t^*)_+$

$$\sum_{i=1}^n \frac{1}{\alpha} (z_i - t^*)_+ + \xi^* = 1 \quad (19)$$

$t^* > 0$  solves the above equation if and only if

$$\sum_{i=1}^n \frac{1}{\alpha} (z_i - t)_+ = 1 \quad (20)$$

since  $\xi^* = 0$  in that case. Hence  $t^* = \max(t_{\max}^*, 0)$ , where  $t_{\max}^*$  is the solution for (20). And we can recover  $x$  from the previous equations.  $\square$

**Claim 4.**  $b^* = \text{prox}_{\sigma_B}^\alpha(\hat{b}) = \underset{b \in B}{\text{argmin}} \frac{1}{2\alpha} \|b - \hat{b}\|^2 + \sigma_B(b)$

$$\Rightarrow b_{i,j}^* = \begin{cases} 0 & (i, j) \in E \\ \hat{b}_{i,j} & i \neq j, (i, j) \notin E \\ \hat{b}_{i,j} - \sigma & i = j \end{cases} \quad (21)$$

#### D.4 Proof of Theorems

We define

$$\partial_\epsilon p_{\sigma_{\mathcal{X}}} = \left\{ z \left| \frac{1}{2} \|z - v\|^2 + x^\top z \leq \min_{z \in \mathbb{R}^n} p_{\sigma_{\mathcal{X}}}(z; v) + \epsilon, \quad \forall x \in \mathcal{X} \right. \right\} \quad (22)$$

we make the following claims.

**Claim 5.** If  $z = v - P_{\mathcal{X}}^\epsilon(v) \in \partial_\epsilon p_{\sigma_{\mathcal{X}}}(v)$ , defined in (22), then

$$\|P_A^\epsilon(v) - P_A(v)\| \leq \sqrt{2\epsilon} \quad (23)$$

For any  $x \in \mathcal{X}$

$$\|P_A^\epsilon(v) - x\|^2 \leq \|v - x\|^2 + \epsilon \quad (24)$$

*Proof.* To prove (23), note that  $p_{\sigma_{\mathcal{X}}}$  is strongly convex in  $z$ , and for any  $z \in \partial_\epsilon p_{\sigma_{\mathcal{X}}}(v)$  the following is true

$$\epsilon \geq p_{\sigma_{\mathcal{X}}}(z; v) - p_{\sigma_{\mathcal{X}}}(z^*; v) \geq \frac{1}{2} \|z - z^*\|^2$$

where  $z^* = \text{prox}_{\sigma_{\mathcal{X}}}(v) = v - P_{\mathcal{X}}(v)$ . Plugging  $z = v - P_{\mathcal{X}}^\epsilon(v)$  in the above relation proves (23). To prove (24) we note that for any  $z \in \partial_\epsilon p_{\sigma_{\mathcal{X}}}(v)$  and  $x \in \mathcal{X}$

$$\frac{1}{2} \|z - v\|^2 + x^\top z \leq \min_{z \in \mathbb{R}^n} p_{\sigma_{\mathcal{X}}}(z; v) + \epsilon \leq p_{\sigma_{\mathcal{X}}}(0; v) + \epsilon = \frac{1}{2} \|v\|^2 + \epsilon$$

Setting  $z = v - P_{\mathcal{X}}^\epsilon(v)$ , and rearranging terms proves (24).  $\square$

**Claim 6.**

$$\text{Prox}_{\sigma_{\mathcal{X}}}(v) = \underset{(a,b)}{\text{argmin}} p_{\sigma_{\mathcal{X}}}(a, b; v) \left( = \frac{1}{2} \|(a+b) - v\|^2 + \sigma_A(a) + \sigma_B(b) \right) \quad (25)$$

*Proof.* Check that  $\iota_{\mathcal{X}}(x) = \iota_A(x) + \iota_B(x)$  and the  $\sigma_{\mathcal{X}}(z) = \max_x x^\top z - \iota_{\mathcal{X}}(z)$ . Following the definition of indicator function of  $\sigma_{\mathcal{X}}$ , we have

$$\min_z \frac{1}{2} \|z - v\|^2 + \sigma_{\mathcal{X}}(z) = \min_z \frac{1}{2} \|z - v\|^2 + \max_x \{x^\top z - \iota_A(x) - \iota_B(x)\}$$

Introducing the support functions  $\sigma_A$  and  $\sigma_B$

$$= \min_z \frac{1}{2} \|z - v\|^2 + \max_x \left\{ x^\top z - \max_a (x^\top a - \sigma_A(a)) - \max_b (x^\top b - \sigma_B(b)) \right\}$$

The maximization over  $a, b$  can be posed as a minimization because of the negative sign. Using strong duality, we get

$$= \min_z \frac{1}{2} \|z - v\|^2 + \max_x \min_{a,b} \{x^\top (z - a - b) + \sigma_A(a) + \sigma_B(b)\}$$

To be dual feasible the coefficient of  $x$  must be zero, leading to  $z = a + b$ , which is used to eliminate  $z$  and we prove the claim.  $\square$

#### D.5 Proof of Theorem 5 (paper)

*Proof.* Starting from  $x_0 \in \mathbb{R}^{n \times n}$ , let  $x_k, k \geq 1$  be defined in (12). Let  $y_k = x_k - \alpha_k h_k$ ,  $r_k = \|x_k - x^*\|_F$ . Then, it follows that

$$\begin{aligned} r_{k+1}^2 &= \|P_X^\epsilon(y_k) - x^*\|_F^2 \leq \|y_k - x^*\|_F^2 + \epsilon \\ &= \|x_k - \alpha_k h_k - x^*\|^2 + \epsilon \\ &= \epsilon + r_k^2 - 2\alpha_k h_k^\top (x_k - x^*) + \alpha_k^2 \|h_k\|^2 \\ &\leq \epsilon + r_k^2 - 2\alpha_k (f(x_k) - f^*) + \alpha_k^2 \|h_k\|^2 \end{aligned} \quad (26)$$

The first inequality is a consequence of (24), and the last inequality is true because of convexity of  $f$ . If we define  $f_T^* = \min \{f(x_i) \mid i \in \{0, \dots, T\}\}$ , then

$$f_T^* - f^* \leq \frac{1}{2 \sum_{k=0}^{T-1} \alpha_k} \left( r_0^2 + \sum_{k=0}^{T-1} (\epsilon + \alpha_k^2 \|h_k\|^2) \right)$$

Under the choice of  $\alpha_k = \frac{s}{\|h_k\|}$  we have

$$f_T^* - f^* \leq \frac{L}{2sT} (R^2 + T(\epsilon + s^2))$$

Minimizing RHS as a function of  $s$  yields  $s = \sqrt{\frac{R^2}{T} + \epsilon}$  and thus proves Theorem 5.  $\square$

## D.6 Proof of Theorem 6 (paper)

*Proof.* Check that for every  $t = 1, \dots, T$ , Algorithm 1 computes  $\hat{a}_t, \hat{b}_t$  such that

$$p_{\sigma_{\mathcal{X}}}(\hat{a}_t, \hat{b}_t; v_t) \leq \min_{a, b \in S_n} p_{\sigma_{\mathcal{X}}}(a, b; v_t) + \frac{\hat{R}^2}{T}$$

and  $\mathbf{K}_t = \text{Proj}_A(v_t - \hat{a}_t - \hat{b}_t)$ . Using  $\mathbf{K}^* \in A$  and the non-expansiveness of the projection operator, the following holds

$$\|\mathbf{K}_t - \mathbf{K}^*\|_F^2 \leq \|v_t - \hat{a}_t - \hat{b}_t - \mathbf{K}^*\|_F^2$$

The proof follows by retracing the steps in Theorem 5 with  $\epsilon \geq \frac{\hat{R}^2}{T}$ .  $\square$

## E Computation of Constants

We need to evaluate the constants involved in proposed projection method, which are necessary to compute the step size.

### E.1 Computation of $\hat{R}$

Recall that

$$(a^*(v), b^*(v)) = \underset{a, b}{\operatorname{argmin}} \frac{1}{2} \|a + b - v\|^2 + \sigma_A(a) + \sigma_B(b) \quad (27)$$

We define

$$\hat{R}^2 \geq \|a^*(v)\|^2 + \|b^*(v)\|^2 \quad \forall v = \mathbf{K} + h, \mathbf{K} \in A, h \in \partial f(\mathbf{K})$$

where

$$A = \{K \succcurlyeq 0, \operatorname{tr}(K) = n\} \text{ and } B = \{\operatorname{diag}(K) = 1, K_{ij} = 0 \text{ for } (i, j) \notin E\} \quad (28)$$

We have  $\sigma_A(M) = \lambda_{\max}(M)$  and  $\sigma_B(N) = \operatorname{tr}(M)$  if  $M_{ij} = 0$  as soon as  $(i, j) \in E$ , and infinity otherwise. Given a matrix  $Z$ , and its projection  $\hat{Z}$  on  $A \cap B$ , we have  $Y = v - \hat{v} = M + N$  with  $\sigma_A(M) + \sigma_B(N)$  minimal.

We simply need to exhibit a single pair of optimizers  $M, N$ . For this, we may use  $\tilde{A} = \{K \succcurlyeq 0\}$ , for which  $\sigma_{\tilde{A}}(M) = 0$  if  $M \preccurlyeq 0$ , and infinity otherwise.

We have  $Y = M + N$  and thus  $Y \preccurlyeq N$ . Moreover,  $\operatorname{tr}(N) \leq n \lambda_{\max}(Y)$  because the decomposition  $Y = 0 + \lambda_{\max}(Y)I$  is feasible.

Thus,  $\lambda_{\min}(Y) \leq \lambda_{\min}(N) \leq \lambda_{\max}(N) \leq n \lambda_{\max}(Y)$ .

This allows to show that

$$\|N\|_F^2 \leq n \|N\|_{op}^2 \leq n^3 \|Y\|_{op}^2 \quad (29)$$

Now to bound the operator norm of  $Y$  we proceed as follows: by choice  $v = \mathbf{K} + h$  where  $\mathbf{K} \in A$ .



**Bound on  $\|v - \hat{v}\|_F \leq n + L$**

**Proof:**

$$\|Z - \hat{Z}\| \leq \|\mathbf{K} - \text{Proj}_{A \cap B}(\mathbf{K})\| + \|h\|$$

We bound the first term as follows. By definition of projection and since  $\mathbf{I}$  is feasible for both  $A$  and  $B$ , we have

$$\|Y\| \leq \|\mathbf{K} - \text{Proj}_{A \cap B}(\hat{Z})\| \leq \|\mathbf{K} - \mathbf{I}\|$$

Squaring both sides

$$\|\mathbf{K} - \text{Proj}_{A \cap B}(\hat{Z})\|_F^2 \leq \|\mathbf{K} - \mathbf{I}\|^2 = \|\mathbf{K}\|^2 - 2 \text{tr}(\mathbf{K}) + \text{tr}(\mathbf{I}) \leq n$$

Substituting this estimate in  $\hat{R}^2 = n^3 \|Y\|_{op}^2 \leq n^5$

## E.2 Computation of $\mathbf{R}$

For the sets  $A$  defined in (28), note that  $R = \max_{\mathbf{K} \in A} \|\mathbf{K}\|_F$ . We derive a bound on the objective function as follows

$$\|\mathbf{K}\|_F^2 = \text{tr}(\mathbf{K}^2) = \sum_{i=1}^n \lambda_i^2(\mathbf{K}) \leq \left( \sum_{i=1}^n \lambda_i(\mathbf{K}) \right)^2 = (\text{Tr}(\mathbf{K}))^2 = n^2$$

and thus the result follows.

## E.3 Computation of $\mathbf{L}$

For SPORE, the subgradient is given by  $-\frac{1}{2} \mathbf{Y} \alpha \alpha^\top \mathbf{Y} + \beta \mathbf{v} \mathbf{v}^\top$ , which implies that

$$L \leq \max_{0 \leq \alpha_i \leq C, \|v\|_2=1} \left\| \frac{1}{2} \mathbf{Y} \alpha \alpha^\top \mathbf{Y} + \beta \mathbf{v} \mathbf{v}^\top \right\|_F$$

Using the equality  $\|\mathbf{M}\|_F^2 = \sum_i \lambda_i^2(\mathbf{M})$  from Section E.2 above, and convexity, we get

$$L \leq \max_{0 \leq \alpha_i \leq C, \|v\|_2=1} \frac{1}{2} \|\alpha\|_2^2 + \beta \|\mathbf{v}\|_2^2$$

The last inequality follows from the fact that for rank 1 matrices  $\mathbf{u} \mathbf{u}^\top$ ,  $\lambda_{\max} \|\mathbf{u}\|_2^2$ . For the chosen constant  $\beta = \frac{\vartheta(G)}{\vartheta(\tilde{G})}$  from Theorem 4, note that  $\beta \leq 1$ , since whenever  $\vartheta(G) \geq \sqrt{n}$ , we can work on the complement graph and  $\vartheta(G)\vartheta(\tilde{G}) = n$  [6]. Thus, from the constraints on  $\alpha$ , it follows that  $L \leq C^2 \sqrt{n}$ .

## F Multiple Graph Transduction

Recalling the notations in the paper – let  $\mathbb{G} = \{G^{(1)}, \dots, G^{(M)}\}$  be a set of simple graphs  $G^{(k)} = (V, E^{(k)})$ , defined on a common vertex set  $V = [n]$ . We introduce some more notations – let

$$\mathcal{K}(\mathbb{G}) = \{\mathbb{K} | \mathbb{K} = \{\mathbf{K}^{(1)}, \dots, \mathbf{K}^{(M)}\}, \mathbf{K}^{(k)} \in \mathcal{K}(G^{(k)})\} \quad (30)$$

and let  $\tilde{\mathbf{K}}^\eta = \sum_{k \in [M]} \eta_k \mathbf{K}^{(k)}$ , for  $\eta \in \mathcal{S}^{M-1}$ .

At this point, we would like to gather some important results before we prove the improved graph-dependent generalization bound. We define an analog of  $\vartheta$  for the multiple graphs setting –

$$\vartheta(\mathbb{G}) = \min_{\mathbb{K} \in \mathcal{K}(\mathbb{G})} \min_{\eta \in \mathcal{S}^{M-1}} \bar{\omega}(\tilde{\mathbf{K}}^\eta) \quad (31)$$

where  $\bar{\omega}(\cdot)$  is the 1-class SVM dual formulation, defined as –

$$\bar{\omega}(\mathbf{K}) = \max_{\alpha \in \mathbb{R}_+^n} 2\alpha^\top \mathbf{1} - \alpha^\top \mathbf{K} \alpha \quad (32)$$

We also define  $k^*$ , for convenience of the subsequent proofs –

$$k^* = \operatorname{argmin}_{k \in [M]} \vartheta(G^{(k)}) = \operatorname{argmax}_{k \in [M]} \vartheta(\bar{G}^{(k)}) \quad (33)$$

where  $\bar{G}^{(k)}$  is the complement graph of  $G^{(k)}$ . The second equivalence follows from the fact that  $\vartheta(G)\vartheta(\bar{G}) = n$  [6] for any graph  $G$ . We state some important lemmas, used in the generalization analysis. We begin with a trivial bound on the spectral norm of convex combination of graph orthonormal embeddings –

**Lemma 4.** For any  $\mathbb{K} \in \mathcal{K}(\mathbb{G})$  and  $\eta \in \mathcal{S}^{M-1}$ ,

$$\lambda_1(\tilde{\mathbf{K}}^\eta) \leq \lambda_1(\mathbf{K}^{(l^*)}) \quad \text{where} \quad l^* = \operatorname{argmax}_{l \in [M]} \lambda_1(\mathbf{K}^{(l)}) \quad (34)$$

*Proof.* We use convexity of the spectral norm to prove our result –

$$\lambda_1(\tilde{\mathbf{K}}^\eta) = \lambda_1\left(\sum_{k \in [M]} \eta_k \mathbf{K}^{(k)}\right) \leq \sum_{k \in [M]} \eta_k \lambda_1(\mathbf{K}^{(k)}) \leq \max_{\tau \in \mathcal{S}^{M-1}} \sum_{k \in [M]} \tau_k \lambda_1(\mathbf{K}^{(k)}) = \lambda(\mathbf{K}^{(l^*)})$$

where  $l^*$  as in the statement of the Lemma.  $\square$

We bound the spectral norm over all possible orthonormal embeddings of multiple graphs by  $\vartheta$  –

**Lemma 5.** Given a set of simple graphs  $\mathbb{G}$

$$\max_{\mathbb{K} \in \mathcal{K}(\mathbb{G})} \max_{k \in [M]} \lambda_1(\mathbf{K}^{(k)}) = \vartheta(\bar{G}^{(k^*)})$$

where  $\bar{G}^{(k)}$  is the complement graph of  $G^{(k)}$ , and  $k^*$  as in (33).

*Proof.* From Lemma 2 (paper), it follows that  $\max_{\mathbf{K} \in \mathcal{K}(G)} \lambda_1(\mathbf{K}) = \vartheta(\bar{G})$ . Thus, we get

$$\max_{\mathbf{K}^{(k)} \in \mathcal{K}(G^{(k)})} \max_{k \in [M]} \lambda_1(\mathbf{K}^{(k)}) = \max_{k \in [M]} \max_{\mathbf{K} \in \mathcal{K}(G^{(k)})} \lambda_1(\mathbf{K}) = \max_{k \in [M]} \vartheta(\bar{G}^{(k)})$$

The proof follows from the definition of  $k^*$  in (33).  $\square$

Similar to Lemma 3 (paper), we relate MKL formulation to  $\vartheta$  –

**Lemma 6.** Given a set of simple graphs  $\mathbb{G} = \{G^{(1)}, \dots, G^{(M)}\}$  defined on a common vertex set  $V$ , let  $\mathbf{y} \in \mathcal{Y}^n$  be the unknown binary labels. Then, for any subgraph  $S \subseteq V$ ,

$$\min_{\mathbb{K} \in \mathcal{K}(\mathbb{G})} \min_{\eta \in \mathcal{S}^{M-1}} \omega_C(\tilde{\mathbf{K}}^\eta, \mathbf{y}_S) \leq \vartheta(\mathbb{G})/2$$

where  $\vartheta(\mathbb{G})$  as in (31).

*Proof.* For any simple graph  $G = (V, E)$ , with unknown binary labels  $\mathbf{y} \in \mathcal{Y}^n$  over the set  $V$ ; we note an interesting property of orthonormal embedding that if  $\mathbf{U} \in \text{Lab}(G)$ , then  $\tilde{\mathbf{U}} = \mathbf{U}\mathbf{Y} \in \text{Lab}(G)$ , where  $Y_{ij} = y_i$ , for  $i = j$ ; 0 otherwise. Also, before we proceed, we recall a trivial bound  $\omega_C(\tilde{\mathbf{K}}^\eta, \mathbf{y}_S) \leq \omega_\infty(\tilde{\mathbf{K}}^\eta, \mathbf{y})$ , which follows from the primal formulation of SVM. Now, we bound the quantity of interest as follows –

$$\begin{aligned} \min_{\mathbb{K} \in \mathcal{K}(\mathbb{G})} \min_{\eta \in \mathcal{S}^{M-1}} \omega_C(\tilde{\mathbf{K}}^\eta, \mathbf{y}_S) &\leq \min_{\mathbb{K} \in \mathcal{K}(\mathbb{G})} \min_{\eta \in \mathcal{S}^{M-1}} \omega_\infty(\tilde{\mathbf{K}}^\eta, \mathbf{y}) \\ &= \min_{\mathbf{U}^{(k)} \in \text{Lab}(G^{(k)})} \min_{\eta \in \mathcal{S}^{M-1}} \min_{\mathbf{w}^{(k)} \in \mathbb{R}^{d_k}} \frac{1}{2} \sum_{k \in [M]} \eta_k \|\mathbf{w}^{(k)}\|_2^2 \quad \text{s.t.} \quad y_i \sum_{k \in [M]} \eta_k \mathbf{w}^{(k)\top} \mathbf{u}_i^{(k)} \geq 1, \forall i \in [N] \end{aligned}$$

Note that here  $\mathbf{u}_i^{(k)}$  is the  $i^{\text{th}}$  column of the orthonormal embedding of  $k^{\text{th}}$  graph. Also, we assume that each orthonormal embedding  $\mathbf{U}^{(k)}$  is of the dimension  $d_k \times n$ . Now, using the property of orthonormal embedding in the beginning of the proof, we get

$$= \min_{\tilde{\mathbf{U}}^{(k)} \in \text{Lab}(G^{(k)})} \min_{\eta \in \mathcal{S}^{M-1}} \min_{\mathbf{w}^{(k)} \in \mathbb{R}^{d_k}} \frac{1}{2} \sum_{k \in [M]} \eta_k \|\mathbf{w}^{(k)}\|_2^2 \quad \text{s.t.} \quad \sum_{k \in [M]} \eta_k \mathbf{w}^{(k)\top} \tilde{\mathbf{u}}_i^{(k)} \geq 1, \forall i \in [N]$$

where  $\tilde{\mathbf{U}}^{(k)} = \mathbf{U}^{(k)}\mathbf{Y}$ . Finally, using the dual formulation of MKL proves the result.  $\square$

We relate  $\vartheta$  of the multiple graphs (31) to that of individual graphs –

**Lemma 7.**  $\vartheta(\mathbb{G}) \leq \vartheta(G^{(k^*)})$ , where  $\vartheta(\mathbb{G})$  as in (31), and  $k^*$  as in (33).

*Proof.* Proof follows by applying an alternate definition of  $\vartheta$  as in [4] –

$$\vartheta(G) = \min_{\mathbf{K} \in \mathcal{K}(G)} \bar{\omega}(\mathbf{K})$$

where  $\omega(\cdot)$  as in (32). Now, expanding  $\vartheta(\mathbb{G})$ , we get

$$\begin{aligned} \vartheta(\mathbb{G}) &= \min_{\mathbf{K}^{(k)} \in \mathcal{K}(G^{(k)}), \forall k \in [M]} \min_{\eta \in \mathcal{S}^{M-1}} \bar{\omega}\left(\sum_{k \in [M]} \eta_k \mathbf{K}^{(k)}\right) \\ &\leq \min_{\mathbf{K}^{(k)} \in \mathcal{K}(G^{(k)}), \forall k \in [M]} \min_{k \in [M]} \bar{\omega}(\mathbf{K}^{(k)}) \\ &\leq \min_{k \in [M]} \left( \min_{\mathbf{K} \in \mathcal{K}(G^{(k)})} \bar{\omega}(\mathbf{K}) \right) \end{aligned}$$

Using the definition of  $\vartheta$  above, and  $k^*$  as in (33) proves the result.  $\square$

Now, we prove the main result on multiple graph transduction. Let  $\mathbb{K}^*$  be the optimal graph embeddings computed from (17) (paper). Let  $\alpha^*, \eta^*$  be the solution to  $\min_{\eta \in \mathcal{S}^{M-1}} \omega_C(\tilde{\mathbf{K}}^{*\eta}, \mathbf{y}_S)$ , then the final predictions of (17) (paper) is given by  $\hat{y}_i = \sum_{j \in S} \eta_k^* K_{ij}^{*(k)} \alpha_j^* y_j$ ,  $\forall i \in [n]$ . The proposed MKL style solution allows is to extend Theorem 4 (paper) to the multiple graphs setting –

**Theorem 8.** Given a set of simple graphs  $\mathbb{G}$  and labels of a randomly drawn subgraph  $S \subset V$ ,  $m = |S|$ ; let  $\hat{\mathbf{y}}$  be the predictions learnt by MKL-SPORE (17) for parameters  $C = \left(\frac{\vartheta(\mathbb{G})}{m\sqrt{\vartheta(\bar{G}^{(k^*)})}}\right)^{\frac{1}{2}}$  and  $\beta = \frac{\vartheta(\mathbb{G})}{\vartheta(\bar{G}^{(k^*)})}$ , where  $k^*$  as in (33). Then, for  $m \leq n/2$ , with probability  $\geq 1 - \delta$  over the choice of  $S \subseteq V$ , such that  $|S| = m$

$$er_S^{0.1}[\hat{\mathbf{y}}] = O\left(\frac{1}{m} \left(\sqrt{n\vartheta(\mathbb{G})} + \log \frac{1}{\delta}\right)\right)^{\frac{1}{2}}$$

where  $\vartheta(\mathbb{G})$  as in (31).

*Proof.* Let  $\mathbb{K}^* = \{\mathbf{K}^{*(1)}, \dots, \mathbf{K}^{*(M)}\}$ ,  $\eta^*$  be the kernels learnt by MKL-SPORE (17) (paper). Let  $\tilde{\mathbf{K}}^{*\eta^*} = \sum_{k \in [M]} \eta_k^* \mathbf{K}^{*(k)}$ . Applying Theorem 1 (paper) for the final predictions  $\hat{\mathbf{y}}$ , we obtain

$$er_S^{0.1}[\hat{\mathbf{y}}] \leq \frac{1}{m} \sum_{i \in S} \ell^{hng}(y_i, \hat{y}_i) + 2C \sqrt{2\lambda_1(\tilde{\mathbf{K}}^{*\eta^*})} + O\left(\sqrt{\frac{1}{m} \log \frac{1}{\delta}}\right)$$

Using  $\lambda_1(\tilde{\mathbf{K}}^{*\eta^*}) \leq \lambda_1(\mathbf{K}^{*(l^*)})$  from Lemma 4, where  $l^*$  as in (34) and  $\lambda_1(\mathbf{K}^{*(l^*)}) \leq \vartheta(\bar{G}^{(l^*)})$  from Lemma 2 (paper), we get

$$\leq \frac{1}{m} \sum_{i \in S} \ell^{hng}(y_i, \hat{y}_i) + 2C \sqrt{2\vartheta(\bar{G}^{(l^*)})} + O\left(\sqrt{\frac{1}{m} \log \frac{1}{\delta}}\right) \quad (35)$$

where  $\bar{G}^{(l^*)}$  is complement graph of  $G^{(l^*)}$ . Using a similar argument as in the proof of Theorem 4 (paper), using the primal formulation of (3) (paper), we get

$$\begin{aligned} C \sum_{i \in S} \ell^{hng}(y_i, \hat{y}_i) &\leq \omega_C(\tilde{\mathbf{K}}^{*\eta^*}, \mathbf{y}_S) \leq \Phi_{C,\beta}(\mathbb{G}, \mathbf{y}_S) \\ &= \min_{\mathbf{K} \in \mathcal{K}(\mathbb{G})} \left( \min_{\eta \in \mathcal{S}^{M-1}} \omega_C(\tilde{\mathbf{K}}^\eta, \mathbf{y}_S) + \beta \max_{k \in [M]} \lambda_1(\mathbf{K}^{(k)}) \right) \\ &\leq \min_{\mathbf{K} \in \mathcal{K}(\mathbb{G})} \min_{\eta \in \mathcal{S}^{M-1}} \omega_C(\tilde{\mathbf{K}}^\eta, \mathbf{y}_S) + \beta \max_{\mathbf{K} \in \mathcal{K}(\mathbb{G})} \max_{k \in [M]} \lambda_1(\mathbf{K}) \leq \frac{\vartheta(\mathbb{G})}{2} + \beta \vartheta(\bar{G}^{(k^*)}) \end{aligned}$$

The last inequality follows from Lemma 5 and Lemma 6. Plugging back in (35) –

$$er_S^{0.1}[\hat{\mathbf{y}}] \leq \frac{1}{2Cm} \vartheta(\mathbb{G}) + \frac{\beta}{Cm} \vartheta(\bar{G}^{(k^*)}) + 2C \sqrt{2\vartheta(\bar{G}^{(k^*)})} + O\left(\sqrt{\frac{1}{m} \log \frac{1}{\delta}}\right)$$

where the last inequality follows by using  $\vartheta(\bar{G}^{(l^*)}) \leq \vartheta(\bar{G}^{(k^*)})$ , from the definition of  $k^*$  (33).

Choosing  $\beta$  such that  $\frac{\beta}{Cm} \vartheta(\bar{G}^{(k^*)}) = 2C \sqrt{2\vartheta(\bar{G}^{(k^*)})}$  and optimizing for  $C$  gives us the choice of parameters as in the statement of the theorem. Plugging back in (35), we get

$$= O\left(\frac{1}{\sqrt{m}} \left( \sqrt{\vartheta(\mathbb{G}) \vartheta(\bar{G}^{(k^*)})} + \sqrt{\log \frac{1}{\delta}} \right)\right) = O\left(\frac{1}{m} \left( \vartheta(\mathbb{G}) \sqrt{\vartheta(\bar{G}^{(k^*)})} + \log \frac{1}{\delta} \right)\right)^{\frac{1}{2}}$$

where the last inequality follows from concavity  $\sqrt{a} + \sqrt{b} \leq \sqrt{2(a+b)}$ . Finally, using  $\vartheta(\mathbb{G}) \leq \vartheta(G^{(k^*)})$  from the definition of  $k^*$ , and  $\vartheta(G^{(k^*)}) \vartheta(\bar{G}^{(k^*)}) = n$  [6] proves the result.  $\square$

We can also apply the proposed algorithm in Section 4 to solve for (17) efficiently. Let  $\mathbf{Y}$  be a diagonal matrix such that  $Y_{ii} = y_i$ , for  $i \in S$ , and 0 otherwise. The subgradient at  $t^{th}$  iteration, for the  $k^{th}$  graph is given by  $\partial_{\mathbf{K}_t^{(k)}} \bar{g}(\mathbb{K}_t) = -\frac{1}{2} \eta_{tk} \mathbf{Y} \alpha_t \alpha_t^\top \mathbf{Y} + \mathbb{1}[k = l^*] \beta \mathbf{v}_t \mathbf{v}_t^\top$ , where  $\eta_t$ ,  $\alpha_t$  are the solutions returned by MKL  $\min_{\eta \in \mathcal{S}^{M-1}} \omega_C(\tilde{\mathbf{K}}_t^\eta, \mathbf{y}_S)$ , and  $\mathbf{v}_t = \arg\max_{\mathbf{v} \in \mathbb{R}^n, \|\mathbf{v}\|=1} \mathbf{v}^\top \mathbf{K}_t^{(l^*)} \mathbf{v}$  is maximum Eigen vector of  $\mathbf{K}_t^{(l^*)}$ , where  $l^* = \arg\max_{l \in [M]} \lambda_1(\mathbf{K}_t^{(l)})$  as in Lemma 4.

## References

- [1] T. H. Cormen, C. E. Leiserson, R. L. Rivest, and C. Stein. *Introduction to algorithms*, volume 2. MIT press Cambridge, 2001.
- [2] R. El-Yaniv and D. Pechyony. Stable transductive learning. In *Learning Theory*, pages 35–49. Springer, 2006.
- [3] R. El-Yaniv and D. Pechyony. Transductive Rademacher complexity and its applications. In *Learning Theory*, pages 157–171. Springer, 2007.
- [4] V. Jethava, A. Martinsson, C. Bhattacharyya, and D. P. Dubhashi. The Lovász  $\vartheta$  function, SVMs and finding large dense subgraphs. In *NIPS*, pages 1169–1177, 2012.
- [5] F. D. Johansson, V. Jethava, D. P. Dubhashi, and C. Bhattacharyya. Global graph kernels using geometric embeddings. In *ICML*, pages 694–702, 2014.
- [6] L. Lovász. On the shannon capacity of a graph. *Information Theory, IEEE Transactions on*, 25(1):1–7, 1979.
- [7] R. Shivanna and C. Bhattacharyya. Learning on graphs using Orthonormal Representation is Statistically Consistent. In *NIPS*, pages 3635–3643, 2014.
